# Supplementary material for: Solid-state assemblies from pyridine-2,6-dicarboxylates: “changing the instruction set through hydration”
Source: Royal Society of Chemistry journal article supplement (doi:10.1039/b617051j), 2007-01-01
Supplement: b617051j.pdf [file b617051j.pdf]

# Polymorphism in pyridine-2,6-dicarboxylic acid: competition between "robust" synthons

## Supplementary data index:

|                                                        |       |
|--------------------------------------------------------|-------|
| Index                                                  | 1     |
| Atomic numbering schemes: <b>4b</b> and <b>6</b>       | 2     |
| Revised numbering scheme for mono-hydrate <sup>4</sup> | 2     |
| Enlarged version of <b>Fig. 4</b>                      | 3     |
| Enlarged version of <b>Fig. 5</b>                      | 3     |
| Enlarged version of <b>Fig. 6</b>                      | 4     |
| Crystallographic tables for <b>4b</b>                  | 9-11  |
| Ortep plot (including numbering scheme) of <b>4b</b>   | 12    |
| Crystallographic tables for <b>6</b>                   | 13-15 |
| Ortep plot (including numbering scheme) of <b>6</b>    | 16    |

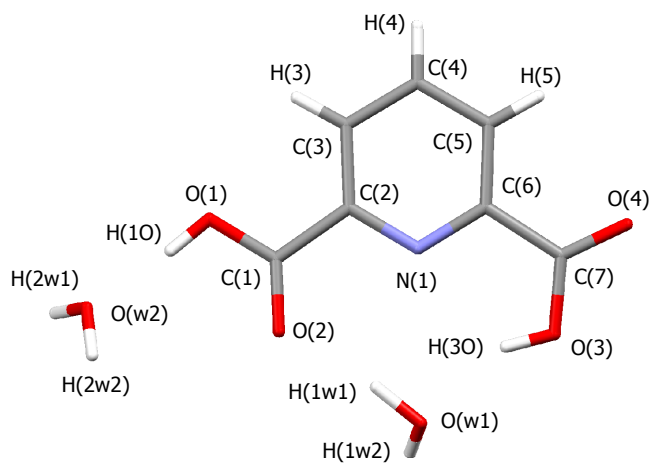

**Supplementary Fig. 1** Crystal structure and numbering scheme of **4b**.

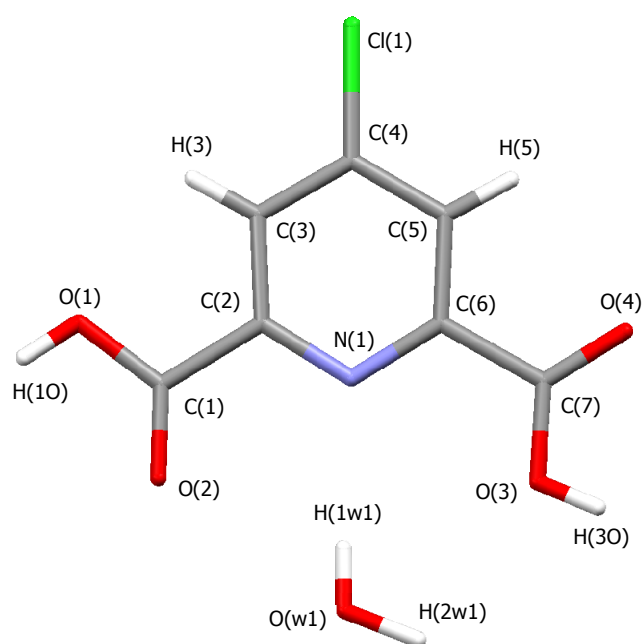

**Supplementary Fig. 2** Crystal structure and numbering scheme of 4-chloropyridine-2,6-dicarboxylic acid mono-hydrate **6**.

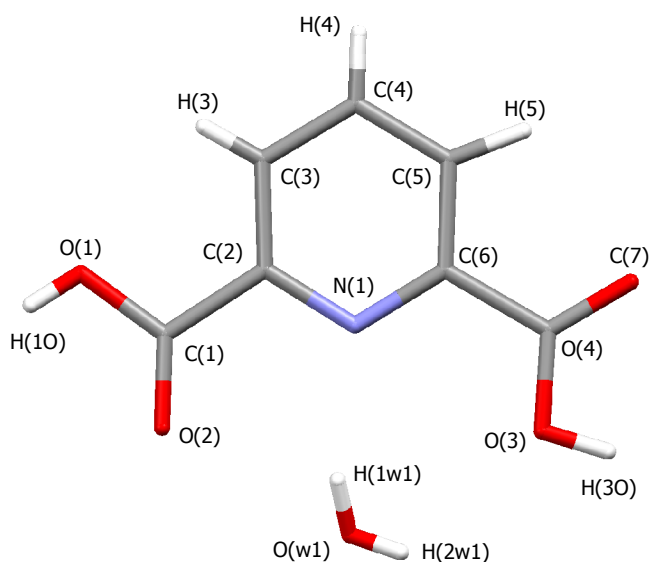

**Supplementary Fig. 3** Crystal structure and numbering scheme\* of dipicolinic acid mono-hydrate.<sup>4\*</sup> (revised order for consistency within this publication).

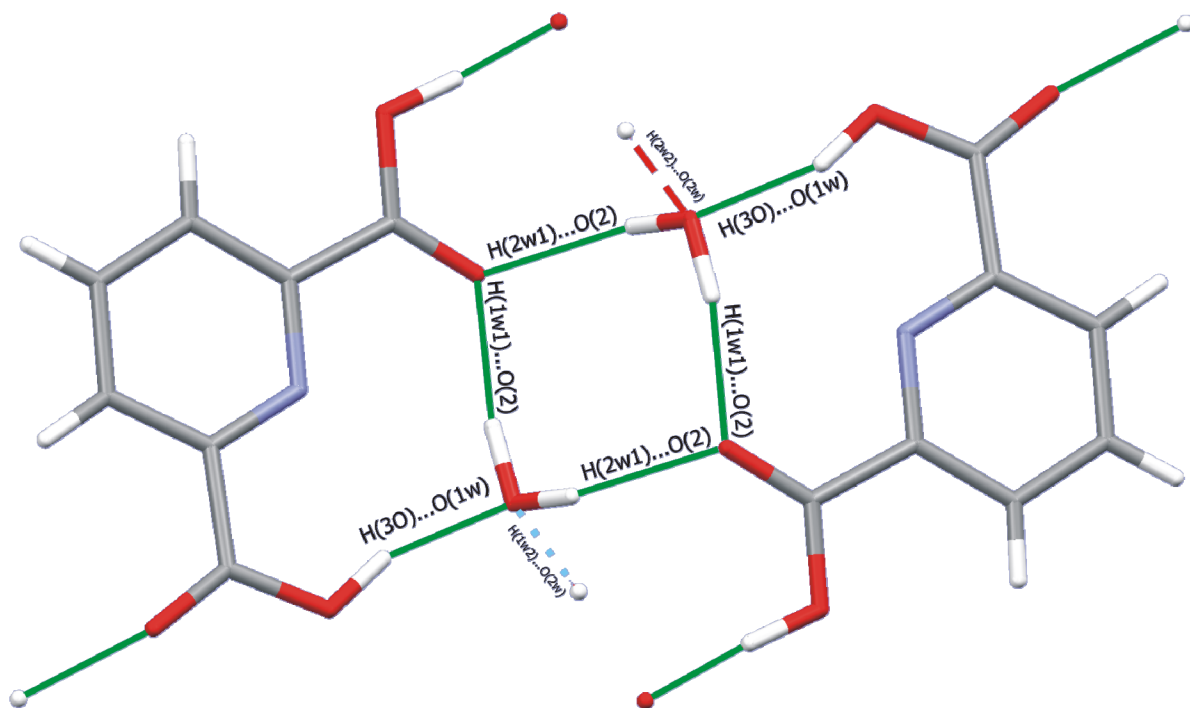

Supplementary Fig. 4 Enlarged Fig. 4

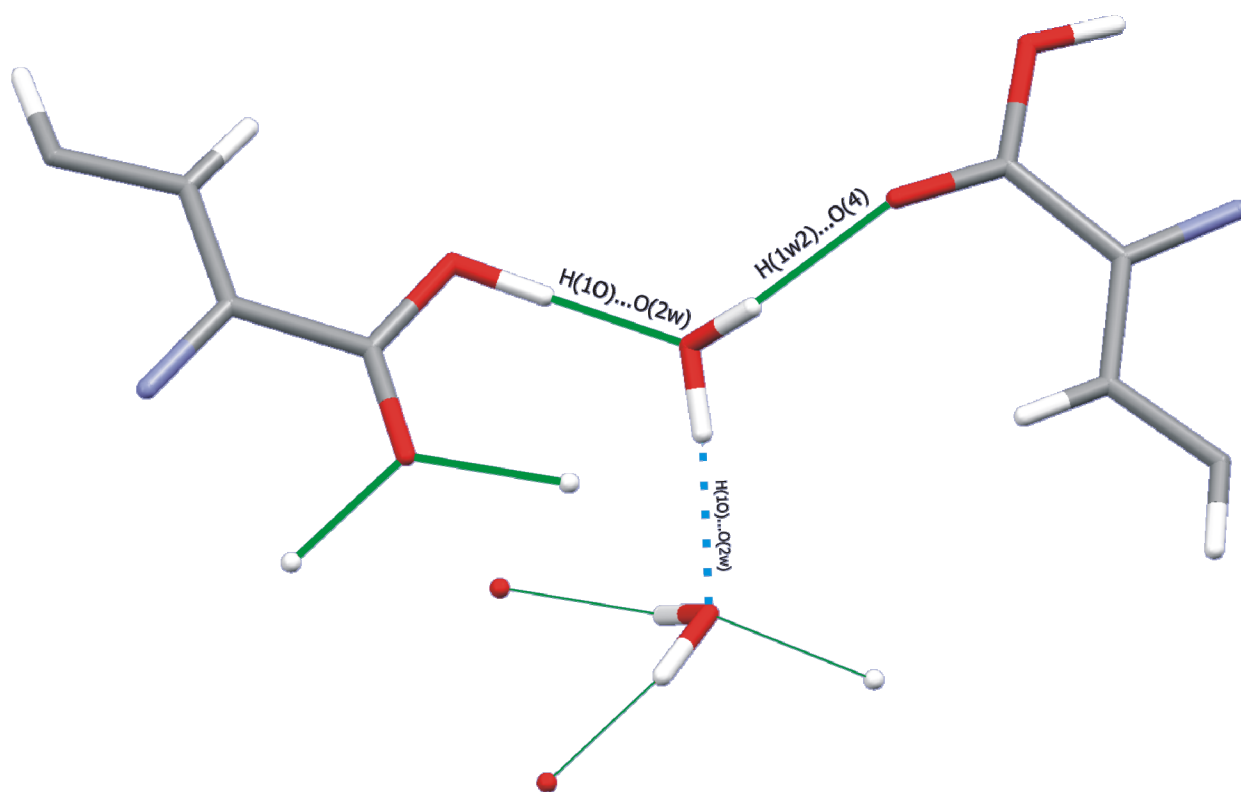

Supplementary Fig. 5 Enlarged Fig. 5

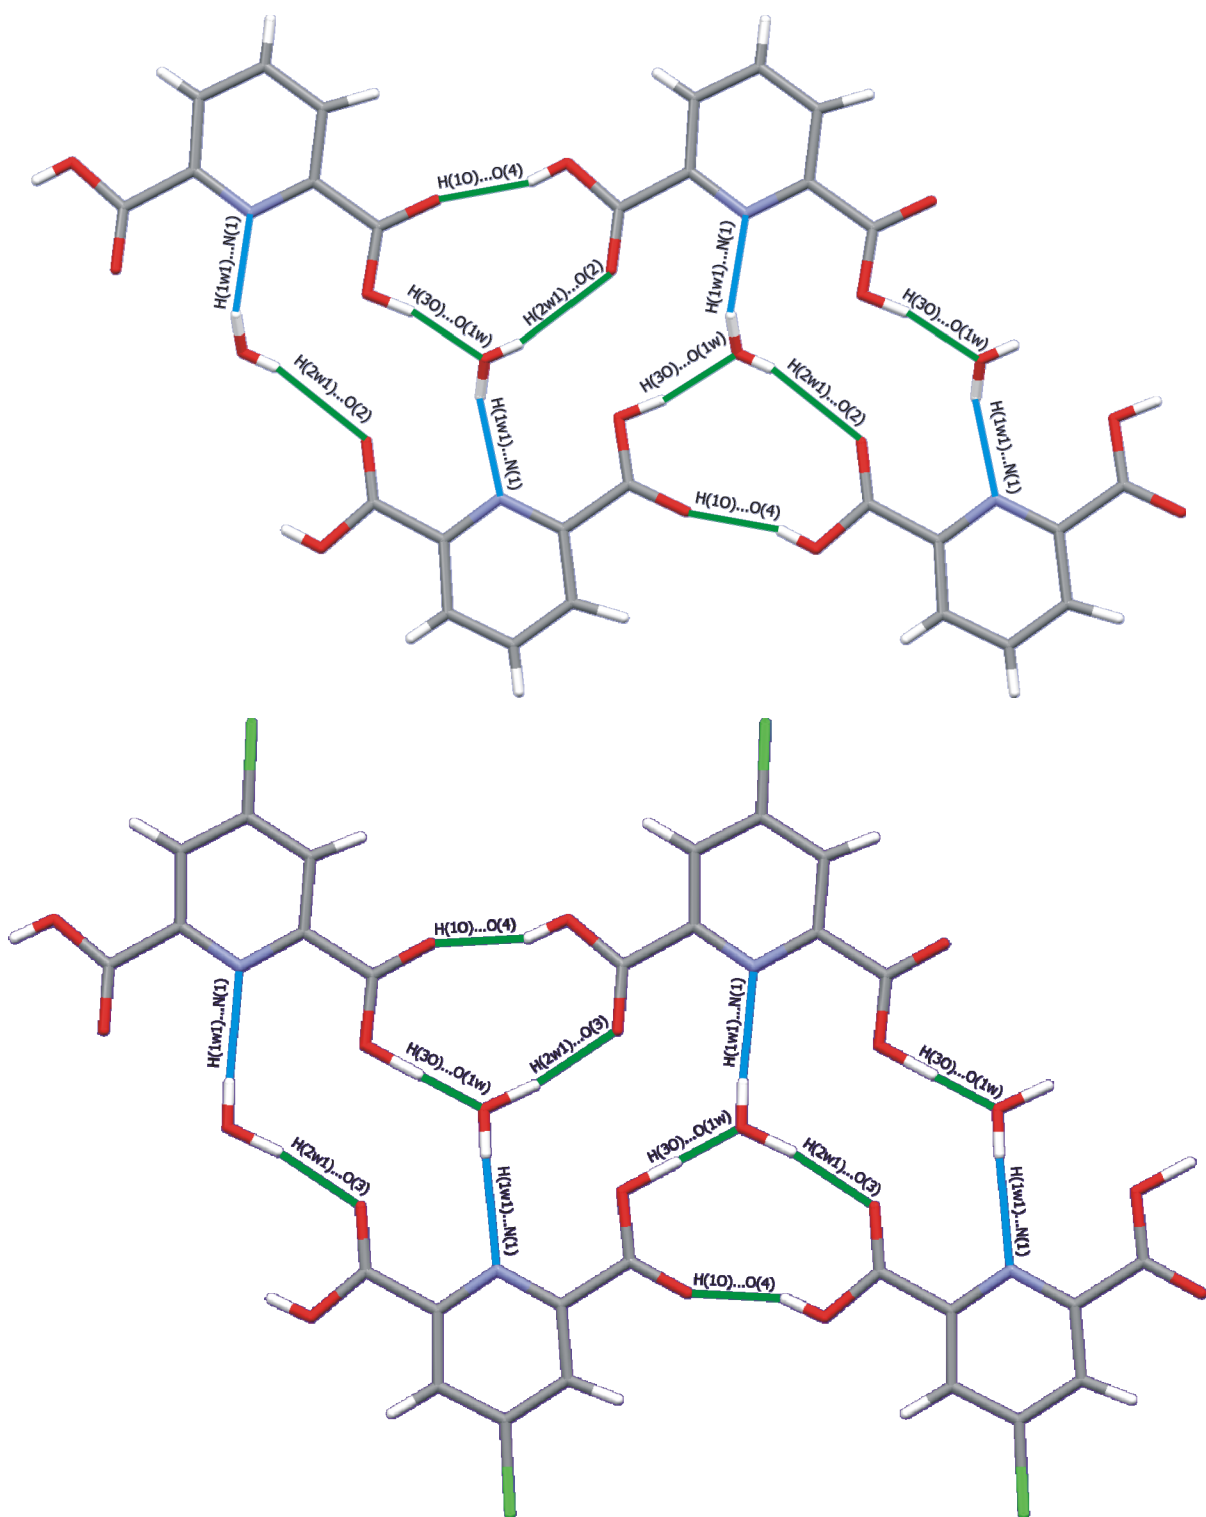

Supplementary Fig. 6 Enlarged Fig. 6

Supplementary Table 1. Crystal data and structure refinement of 4b.

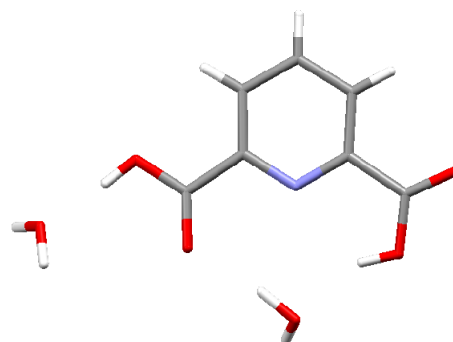

|                                                                                        |                                                             |                             |
|----------------------------------------------------------------------------------------|-------------------------------------------------------------|-----------------------------|
| Identification code                                                                    | <b>4b</b>                                                   |                             |
| Empirical formula                                                                      | C <sub>7</sub> H <sub>9</sub> NO <sub>6</sub>               |                             |
| Formula weight                                                                         | 203.15                                                      |                             |
| Temperature                                                                            | 120(2) K                                                    |                             |
| Wavelength                                                                             | 0.71073 Å                                                   |                             |
| Crystal system                                                                         | Monoclinic                                                  |                             |
| Space group                                                                            | <i>P</i> 2 <sub>1</sub> / <i>c</i>                          |                             |
| Unit cell dimensions                                                                   | <i>a</i> = 3.65790(10) Å                                    | $\alpha = 90^\circ$         |
|                                                                                        | <i>b</i> = 11.0577(4) Å                                     | $\beta = 93.0200(10)^\circ$ |
|                                                                                        | <i>c</i> = 21.5478(10) Å                                    | $\gamma = 90^\circ$         |
| <b>Volume</b>                                                                          | <b>870.35(6) Å<sup>3</sup></b>                              |                             |
| <i>Z</i>                                                                               | 4                                                           |                             |
| Density (calculated)                                                                   | 1.550 Mg / m <sup>3</sup>                                   |                             |
| Absorption coefficient                                                                 | 0.138 mm <sup>-1</sup>                                      |                             |
| <i>F</i> (000)                                                                         | 424                                                         |                             |
| Crystal                                                                                | Plate; Colourless                                           |                             |
| Crystal size                                                                           | 0.34 × 0.32 × 0.12 mm <sup>3</sup>                          |                             |
| $\theta$ range for data collection                                                     | 3.39 – 27.48°                                               |                             |
| Index ranges                                                                           | −4 ≤ <i>h</i> ≤ 4, −14 ≤ <i>k</i> ≤ 14, −27 ≤ <i>l</i> ≤ 27 |                             |
| Reflections collected                                                                  | 9977                                                        |                             |
| Independent reflections                                                                | 1969 [ <i>R</i> <sub>int</sub> = 0.0812]                    |                             |
| Completeness to $\theta = 27.48^\circ$                                                 | 98.8 %                                                      |                             |
| Absorption correction                                                                  | Semi-empirical from equivalents                             |                             |
| Max. and min. transmission                                                             | 0.9836 and 0.9545                                           |                             |
| Refinement method                                                                      | Full-matrix least-squares on <i>F</i> <sup>2</sup>          |                             |
| Data / restraints / parameters                                                         | 1969 / 0 / 145                                              |                             |
| Goodness-of-fit on <i>F</i> <sup>2</sup>                                               | 1.013                                                       |                             |
| Final <i>R</i> indices [ <i>F</i> <sup>2</sup> > 2 $\sigma$ ( <i>F</i> <sup>2</sup> )] | <i>R</i> 1 = 0.0466, <i>wR</i> 2 = 0.0927                   |                             |
| <i>R</i> indices (all data)                                                            | <i>R</i> 1 = 0.0929, <i>wR</i> 2 = 0.1119                   |                             |
| Largest diff. peak and hole                                                            | 0.241 and −0.238 e Å <sup>-3</sup>                          |                             |

**Diffraction:** Nonius KappaCCD area detector ( $\phi$  scans and  $\omega$  scans to fill *asymmetric unit* sphere). **Cell determination:** DirAx (Duisenberg, A.J.M.(1992). *J. Appl. Cryst.* 25, 92-96.) **Data collection:** Collect (Collect: Data collection software, R. Hooft, Nonius B.V., 1998). **Data reduction and cell refinement:** Denzo (Z. Otwinowski & W. Minor, *Methods in Enzymology* (1997) Vol. 276: *Macromolecular Crystallography*, part A, pp. 307–326; C. W. Carter, Jr. & R. M. Sweet, Eds., Academic Press). **Absorption correction:** SORTAV (R. H. Blessing, *Acta Cryst.* A51 (1995) 33–37; R. H. Blessing, *J. Appl. Cryst.* 30 (1997) 421–426). **Structure solution:** SHELXS97 (G. M. Sheldrick, *Acta Cryst.* (1990) A46 467–473). **Structure refinement:** SHELXL97 (G. M. Sheldrick (1997), University of Göttingen, Germany). **Graphics:** Cameron - A Molecular Graphics Package. (D. M. Watkin, L. Pearce and C. K. Prout, Chemical Crystallography Laboratory, University of Oxford, 1993).

**Special details:** All carbon hydrogen atoms fixed at idealized positions, with a riding model and fixed thermal parameters [*U*<sub>ij</sub> = 1.2*U*<sub>ij</sub> (eq) for the atom to which they are bonded] were used for subsequent refinements.

**Supplementary Table 2.** Atomic coordinates [ $\times 10^4$ ], equivalent isotropic displacement parameters [ $\text{\AA}^2 \times 10^3$ ] and site occupancy factors.  $U_{eq}$  is defined as one third of the trace of the orthogonalized  $U^{ij}$  tensor.

| Atom | <i>x</i> | <i>y</i> | <i>z</i> | $U_{eq}$ | <i>S.o.f.</i> |
|------|----------|----------|----------|----------|---------------|
| C1   | 7737(5)  | 2559(2)  | 4778(1)  | 19(1)    | 1             |
| C2   | 6046(5)  | 3096(2)  | 4193(1)  | 18(1)    | 1             |
| C3   | 5900(5)  | 4334(2)  | 4084(1)  | 21(1)    | 1             |
| C4   | 4354(5)  | 4742(2)  | 3521(1)  | 24(1)    | 1             |
| C5   | 2921(5)  | 3910(2)  | 3094(1)  | 22(1)    | 1             |
| C6   | 3096(5)  | 2692(2)  | 3251(1)  | 20(1)    | 1             |
| C7   | 1393(5)  | 1751(2)  | 2824(1)  | 24(1)    | 1             |
| N1   | 4663(4)  | 2282(1)  | 3782(1)  | 19(1)    | 1             |
| O1   | 8888(4)  | 3364(1)  | 5189(1)  | 26(1)    | 1             |
| O2   | 8008(4)  | 1468(1)  | 4855(1)  | 26(1)    | 1             |
| O3   | 1490(4)  | 615(1)   | 3015(1)  | 30(1)    | 1             |
| O4   | -127(4)  | 2016(1)  | 2328(1)  | 31(1)    | 1             |
| O1W  | 4469(4)  | -296(1)  | 4079(1)  | 29(1)    | 1             |
| O2W  | 1966(4)  | 2587(2)  | 1154(1)  | 32(1)    | 1             |

**Supplementary Table 3.** Bond lengths [ $\text{\AA}$ ] and angles [ $^\circ$ ].

|          |            |               |            |
|----------|------------|---------------|------------|
| C1–O2    | 1.221(2)   | C6–N1         | 1.332(2)   |
| C1–O1    | 1.311(2)   | C6–C7         | 1.502(3)   |
| C1–C2    | 1.497(3)   | C7–O4         | 1.215(2)   |
| C2–N1    | 1.342(2)   | C7–O3         | 1.322(2)   |
| C2–C3    | 1.389(3)   | O1–H1O        | 0.8400     |
| C3–C4    | 1.386(3)   | O3–H3O        | 0.8400     |
| C3–H3    | 0.9500     | O1W–H1W1      | 0.96(3)    |
| C4–C5    | 1.384(3)   | O1W–H2W1      | 0.88(3)    |
| C4–H4    | 0.9500     | O2W–H1W2      | 0.84(3)    |
| C5–C6    | 1.390(2)   | O2W–H2W2      | 0.90(3)    |
| C5–H5    | 0.9500     |               |            |
| O2–C1–O1 | 123.87(17) | C4–C5–H5      | 120.9      |
| O2–C1–C2 | 122.33(16) | C6–C5–H5      | 120.9      |
| O1–C1–C2 | 113.80(15) | N1–C6–C5      | 123.42(16) |
| N1–C2–C3 | 122.67(17) | N1–C6–C7      | 115.91(16) |
| N1–C2–C1 | 114.40(15) | C5–C6–C7      | 120.65(17) |
| C3–C2–C1 | 122.93(16) | O4–C7–O3      | 120.37(17) |
| C4–C3–C2 | 118.56(17) | O4–C7–C6      | 121.92(17) |
| C4–C3–H3 | 120.7      | O3–C7–C6      | 117.68(17) |
| C2–C3–H3 | 120.7      | C6–N1–C2      | 117.95(15) |
| C5–C4–C3 | 119.24(17) | C1–O1–H1O     | 109.5      |
| C5–C4–H4 | 120.4      | C7–O3–H3O     | 109.5      |
| C3–C4–H4 | 120.4      | H1W1–O1W–H2W1 | 104(2)     |
| C4–C5–C6 | 118.12(17) | H1W2–O2W–H2W2 | 109(2)     |

Symmetry transformations used to generate equivalent atoms:

**Supplementary Table 4.** Anisotropic displacement parameters [ $\text{\AA}^2 \times 10^3$ ]. The anisotropic displacement factor exponent takes the form:  $-2\pi^2[h^2a^{*2}U^{11} + \dots + 2hk a^* b^* U^{12}]$ .

| Atom | $U^{11}$ | $U^{22}$ | $U^{33}$ | $U^{23}$ | $U^{13}$ | $U^{12}$ |
|------|----------|----------|----------|----------|----------|----------|
| C1   | 18(1)    | 23(1)    | 17(1)    | -3(1)    | 2(1)     | -3(1)    |
| C2   | 14(1)    | 24(1)    | 17(1)    | 0(1)     | 2(1)     | -1(1)    |
| C3   | 19(1)    | 21(1)    | 23(1)    | -3(1)    | 2(1)     | -3(1)    |
| C4   | 24(1)    | 19(1)    | 29(1)    | 4(1)     | 1(1)     | 1(1)     |
| C5   | 20(1)    | 28(1)    | 19(1)    | 6(1)     | -1(1)    | 2(1)     |
| C6   | 17(1)    | 25(1)    | 18(1)    | -1(1)    | 0(1)     | 0(1)     |
| C7   | 21(1)    | 30(1)    | 19(1)    | -1(1)    | 1(1)     | 0(1)     |
| N1   | 18(1)    | 22(1)    | 17(1)    | -1(1)    | 1(1)     | -2(1)    |
| O1   | 35(1)    | 26(1)    | 18(1)    | 0(1)     | -8(1)    | -2(1)    |
| O2   | 36(1)    | 19(1)    | 22(1)    | 1(1)     | -4(1)    | -2(1)    |
| O3   | 41(1)    | 24(1)    | 24(1)    | -4(1)    | -7(1)    | -4(1)    |
| O4   | 33(1)    | 40(1)    | 18(1)    | 0(1)     | -7(1)    | -2(1)    |
| O1W  | 39(1)    | 22(1)    | 25(1)    | 0(1)     | -1(1)    | -3(1)    |
| O2W  | 42(1)    | 33(1)    | 21(1)    | 1(1)     | -2(1)    | -7(1)    |

**Supplementary Table 5.** Hydrogen coordinates [ $\times 10^4$ ] and isotropic displacement parameters [ $\text{\AA}^2 \times 10^3$ ].

| Atom | $x$      | $y$      | $z$      | $U_{eq}$ | <i>S.o.f.</i> |
|------|----------|----------|----------|----------|---------------|
| H3   | 6840     | 4889     | 4389     | 25       | 1             |
| H4   | 4278     | 5582     | 3430     | 29       | 1             |
| H5   | 1849     | 4165     | 2705     | 27       | 1             |
| H1O  | 9778     | 3011     | 5507     | 40       | 1             |
| H3O  | 2532     | 578      | 3371     | 45       | 1             |
| H1W1 | 5650(80) | 360(30)  | 4307(14) | 73(9)    | 1             |
| H1W2 | 1120(80) | 2510(20) | 1506(15) | 58(9)    | 1             |
| H2W1 | 3030(80) | -620(30) | 4348(15) | 74(10)   | 1             |
| H2W2 | 2820(70) | 3350(20) | 1115(12) | 51(8)    | 1             |

**Supplementary Table 6.** Hydrogen bonds [ $\text{\AA}$  and  $^\circ$ ].

| $D-H\cdots A$                        | $d(D-H)$ | $d(H\cdots A)$ | $d(D\cdots A)$ | $\angle(DHA)$ |
|--------------------------------------|----------|----------------|----------------|---------------|
| O3-H3O $\cdots$ O1W                  | 0.84     | 1.91           | 2.6835(19)     | 152.4         |
| O1-H1O $\cdots$ O2W <sup>i</sup>     | 0.84     | 1.70           | 2.539(2)       | 173.5         |
| O1W-H1W1 $\cdots$ O2                 | 0.96(3)  | 1.88(3)        | 2.8372(19)     | 171(2)        |
| O1W-H2W1 $\cdots$ O2 <sup>ii</sup>   | 0.88(3)  | 2.01(3)        | 2.827(2)       | 154(3)        |
| O2W-H2W2 $\cdots$ O1W <sup>iii</sup> | 0.90(3)  | 1.86(3)        | 2.738(2)       | 165(2)        |
| O2W-H1W2 $\cdots$ O4                 | 0.84(3)  | 1.93(3)        | 2.755(2)       | 167(3)        |

Symmetry transformations used to generate equivalent atoms:

- (i)  $x+1, -y+1/2, z+1/2$  (ii)  $-x+1, -y, -z+1$  (iii)  $-x+1, y+1/2, -z+1/2$

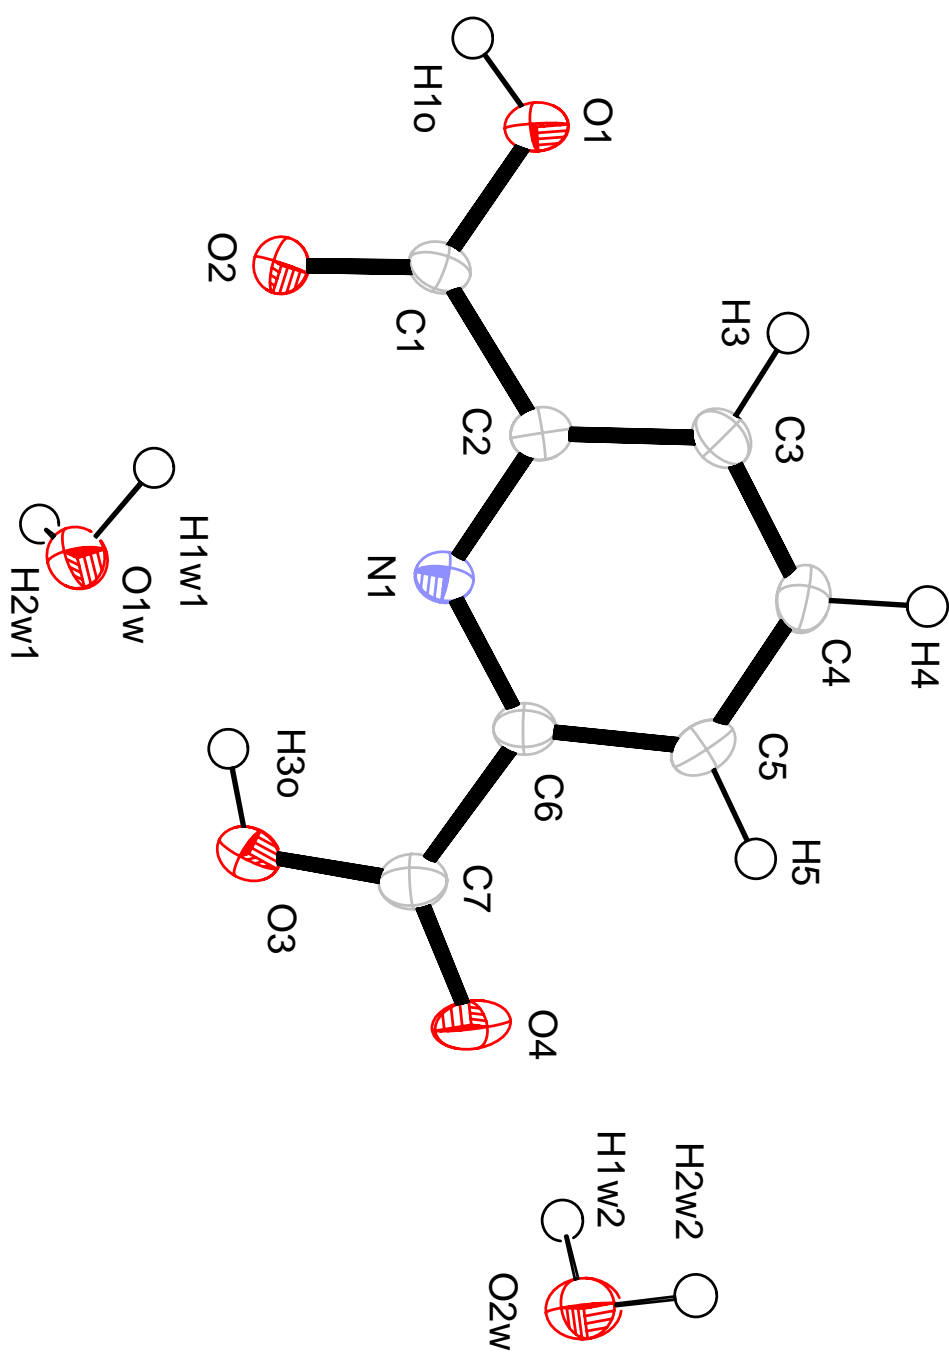

Supplementary Fig. 7 Ortep Plot (including numbering scheme) of 4b:



Supplementary Table 7. Crystal data and structure refinement of **6**.

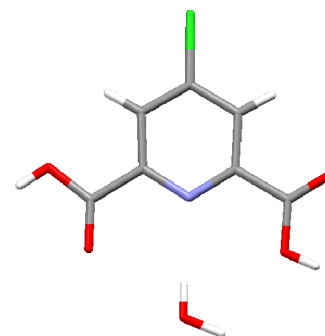

|                                                                                        |                                                             |                           |
|----------------------------------------------------------------------------------------|-------------------------------------------------------------|---------------------------|
| Identification code                                                                    | <b>6</b>                                                    |                           |
| Empirical formula                                                                      | C <sub>7</sub> H <sub>6</sub> ClNO <sub>5</sub>             |                           |
| Formula weight                                                                         | 219.58                                                      |                           |
| Temperature                                                                            | 120(2) K                                                    |                           |
| Wavelength                                                                             | 0.71073 Å                                                   |                           |
| Crystal system                                                                         | Monoclinic                                                  |                           |
| Space group                                                                            | <i>P</i> 2 <sub>1</sub>                                     |                           |
| Unit cell dimensions                                                                   | <i>a</i> = 5.1793(2) Å                                      | $\alpha = 90^\circ$       |
|                                                                                        | <i>b</i> = 9.4760(3) Å                                      | $\beta = 94.289(2)^\circ$ |
|                                                                                        | <i>c</i> = 8.5004(3) Å                                      | $\gamma = 90^\circ$       |
| <b>Volume</b>                                                                          | <b>416.02(3) Å<sup>3</sup></b>                              |                           |
| <i>Z</i>                                                                               | 2                                                           |                           |
| Density (calculated)                                                                   | 1.753 Mg / m <sup>3</sup>                                   |                           |
| Absorption coefficient                                                                 | 0.454 mm <sup>-1</sup>                                      |                           |
| <i>F</i> (000)                                                                         | 224                                                         |                           |
| Crystal                                                                                | Plate; Colourless                                           |                           |
| Crystal size                                                                           | 0.20 × 0.18 × 0.03 mm <sup>3</sup>                          |                           |
| $\theta$ range for data collection                                                     | 3.22 – 27.48°                                               |                           |
| Index ranges                                                                           | –6 ≤ <i>h</i> ≤ 6, –12 ≤ <i>k</i> ≤ 12, –10 ≤ <i>l</i> ≤ 11 |                           |
| Reflections collected                                                                  | 5401                                                        |                           |
| Independent reflections                                                                | 1880 [ <i>R</i> <sub>int</sub> = 0.0491]                    |                           |
| Completeness to $\theta = 27.48^\circ$                                                 | 99.7 %                                                      |                           |
| Absorption correction                                                                  | Semi-empirical from equivalents                             |                           |
| Max. and min. transmission                                                             | 0.9865 and 0.9147                                           |                           |
| Refinement method                                                                      | Full-matrix least-squares on <i>F</i> <sup>2</sup>          |                           |
| Data / restraints / parameters                                                         | 1880 / 1 / 138                                              |                           |
| Goodness-of-fit on <i>F</i> <sup>2</sup>                                               | 1.063                                                       |                           |
| Final <i>R</i> indices [ <i>F</i> <sup>2</sup> > 2 $\sigma$ ( <i>F</i> <sup>2</sup> )] | <i>R</i> 1 = 0.0294, <i>wR</i> 2 = 0.0717                   |                           |
| <i>R</i> indices (all data)                                                            | <i>R</i> 1 = 0.0316, <i>wR</i> 2 = 0.0735                   |                           |
| Absolute structure parameter                                                           | 0.28(5)                                                     |                           |
| Largest diff. peak and hole                                                            | 0.212 and –0.319 e Å <sup>-3</sup>                          |                           |

**Diffractometer:** Nonius KappaCCD area detector ( $\phi$  scans and  $\omega$  scans to fill *asymmetric unit* sphere). **Cell determination:** DirAx (Duisenberg, A.J.M.(1992). *J. Appl. Cryst.* **25**, 92-96.) **Data collection:** Collect (Collect: Data collection software, R. Hooft, Nonius B.V., 1998). **Data reduction and cell refinement:** Denzo (Z. Otwinowski & W. Minor, *Methods in Enzymology* (1997) Vol. **276**: *Macromolecular Crystallography*, part A, pp. 307–326; C. W. Carter, Jr. & R. M. Sweet, Eds., Academic Press). **Absorption correction:** SORTAV (R. H. Blessing, *Acta Cryst.* **A51** (1995) 33–37; R. H. Blessing, *J. Appl. Cryst.* **30** (1997) 421–426). **Structure solution:** SHELXS97 (G. M. Sheldrick, *Acta Cryst.* (1990) **A46** 467–473). **Structure refinement:** SHELXL97 (G. M. Sheldrick (1997), University of Göttingen, Germany). **Graphics:** Cameron - A Molecular Graphics Package. (D. M. Watkin, L. Pearce and C. K. Prout, Chemical Crystallography Laboratory, University of Oxford, 1993).

**Special details:** All carbon hydrogen atoms fixed at idealized positions, with a riding model and fixed thermal parameters [*U*<sub>ij</sub> = 1.2*U*<sub>ij</sub> (eq) for the atom to which they are bonded] were used for subsequent refinements.

**Supplementary Table 8.** Atomic coordinates [ $\times 10^4$ ], equivalent isotropic displacement parameters [ $\text{\AA}^2 \times 10^3$ ] and site occupancy factors.  $U_{eq}$  is defined as one third of the trace of the orthogonalized  $U^{ij}$  tensor.

| Atom | <i>x</i> | <i>y</i>  | <i>z</i>  | $U_{eq}$ | <i>S.o.f.</i> |
|------|----------|-----------|-----------|----------|---------------|
| C11  | 5315(1)  | -18023(1) | -10390(1) | 20(1)    | 1             |
| C5   | 1930(4)  | -16892(2) | -8480(3)  | 17(1)    | 1             |
| C3   | 2088(4)  | -19410(2) | -8572(3)  | 15(1)    | 1             |
| N1   | -899(3)  | -18259(2) | -6951(2)  | 15(1)    | 1             |
| O2   | -2625(3) | -20915(2) | -6144(2)  | 25(1)    | 1             |
| O1   | 377(3)   | -21882(1) | -7579(2)  | 24(1)    | 1             |
| O4   | -410(3)  | -14555(2) | -7357(2)  | 25(1)    | 1             |
| C6   | -4(4)    | -17023(2) | -7445(2)  | 14(1)    | 1             |
| O3   | -3035(3) | -15832(1) | -5950(2)  | 23(1)    | 1             |
| C4   | 2964(3)  | -18109(2) | -9053(2)  | 16(1)    | 1             |
| C7   | -1197(4) | -15680(2) | -6887(3)  | 15(1)    | 1             |
| C2   | 159(4)   | -19422(2) | -7518(2)  | 16(1)    | 1             |
| C1   | -868(4)  | -20816(2) | -6984(2)  | 15(1)    | 1             |
| O1W  | -4877(3) | -23512(2) | -5214(2)  | 29(1)    | 1             |

**Supplementary Table 9.** Bond lengths [ $\text{\AA}$ ] and angles [ $^\circ$ ].

|           |            |               |            |
|-----------|------------|---------------|------------|
| C11–C4    | 1.7282(16) | O1–C1         | 1.319(2)   |
| C5–C4     | 1.376(3)   | O1–H1         | 0.8400     |
| C5–C6     | 1.387(3)   | O4–C7         | 1.220(2)   |
| C5–H5     | 0.9500     | C6–C7         | 1.506(3)   |
| C3–C4     | 1.386(3)   | O3–C7         | 1.295(3)   |
| C3–C2     | 1.391(3)   | O3–H3A        | 0.8400     |
| C3–H3     | 0.9500     | C2–C1         | 1.506(3)   |
| N1–C2     | 1.337(2)   | O1W–H1WB      | 0.79(3)    |
| N1–C6     | 1.339(2)   | O1W–H1WA      | 1.01(4)    |
| O2–C1     | 1.202(2)   |               |            |
| C4–C5–C6  | 117.96(16) | C5–C4–C11     | 120.37(14) |
| C4–C5–H5  | 121.0      | C3–C4–C11     | 119.89(14) |
| C6–C5–H5  | 121.0      | O4–C7–O3      | 125.3(2)   |
| C4–C3–C2  | 117.68(18) | O4–C7–C6      | 118.7(2)   |
| C4–C3–H3  | 121.2      | O3–C7–C6      | 115.95(16) |
| C2–C3–H3  | 121.2      | N1–C2–C3      | 123.96(17) |
| C2–N1–C6  | 116.58(14) | N1–C2–C1      | 116.81(17) |
| C1–O1–H1  | 109.5      | C3–C2–C1      | 119.23(17) |
| N1–C6–C5  | 124.07(17) | O2–C1–O1      | 125.56(18) |
| N1–C6–C7  | 118.72(17) | O2–C1–C2      | 123.21(17) |
| C5–C6–C7  | 117.19(17) | O1–C1–C2      | 111.22(18) |
| C7–O3–H3A | 109.5      | H1WB–O1W–H1WA | 112(3)     |
| C5–C4–C3  | 119.74(14) |               |            |

Symmetry transformations used to generate equivalent atoms:

**Supplementary Table 10.** Anisotropic displacement parameters [ $\text{\AA}^2 \times 10^3$ ]. The anisotropic displacement factor exponent takes the form:  $-2\pi^2[h^2 a^{*2} U^{11} + \dots + 2 h k a^* b^* U^{12}]$ .

| Atom | $U^{11}$ | $U^{22}$ | $U^{33}$ | $U^{23}$ | $U^{13}$ | $U^{12}$ |
|------|----------|----------|----------|----------|----------|----------|
| C11  | 20(1)    | 19(1)    | 24(1)    | 2(1)     | 12(1)    | -1(1)    |
| C5   | 20(1)    | 12(1)    | 19(1)    | 2(1)     | 1(1)     | -4(1)    |
| C3   | 17(1)    | 10(1)    | 19(1)    | -1(1)    | 6(1)     | 1(1)     |
| N1   | 17(1)    | 10(1)    | 17(1)    | 0(1)     | 4(1)     | 1(1)     |
| O2   | 29(1)    | 13(1)    | 34(1)    | 1(1)     | 19(1)    | -1(1)    |
| O1   | 32(1)    | 8(1)     | 33(1)    | 1(1)     | 17(1)    | -1(1)    |
| O4   | 32(1)    | 11(1)    | 35(1)    | 0(1)     | 16(1)    | 0(1)     |
| C6   | 17(1)    | 13(1)    | 14(1)    | 0(1)     | 4(1)     | 0(1)     |
| O3   | 27(1)    | 11(1)    | 33(1)    | -1(1)    | 16(1)    | 2(1)     |
| C4   | 16(1)    | 17(1)    | 15(1)    | 2(1)     | 6(1)     | 1(1)     |
| C7   | 17(1)    | 11(1)    | 17(1)    | -1(1)    | 2(1)     | -1(1)    |
| C2   | 17(1)    | 10(1)    | 20(1)    | 2(1)     | 1(1)     | -1(1)    |
| C1   | 18(1)    | 9(1)     | 19(1)    | -2(1)    | 5(1)     | 1(1)     |
| O1W  | 33(1)    | 13(1)    | 44(1)    | 1(1)     | 26(1)    | 1(1)     |

**Supplementary Table 11.** Hydrogen coordinates [ $\times 10^4$ ] and isotropic displacement parameters [ $\text{\AA}^2 \times 10^3$ ].

| Atom | $x$       | $y$        | $z$       | $U_{eq}$ | $S.o.f.$ |
|------|-----------|------------|-----------|----------|----------|
| H5   | 2521      | -15991     | -8784     | 20       | 1        |
| H3   | 2781      | -20263     | -8949     | 18       | 1        |
| H1   | -317      | -22644     | -7336     | 35       | 1        |
| H3A  | -3656     | -15038     | -5752     | 34       | 1        |
| H1WB | -6050(50) | -23470(40) | -4670(30) | 42(8)    | 1        |
| H1WA | -4200(60) | -22540(40) | -5470(30) | 50(9)    | 1        |

**Supplementary Table 12.** Hydrogen bonds [ $\text{\AA}$  and  $^\circ$ ].

| $D-H\cdots A$                       | $d(D-H)$ | $d(H\cdots A)$ | $d(D\cdots A)$ | $\angle(DHA)$ |
|-------------------------------------|----------|----------------|----------------|---------------|
| O1-H1 $\cdots$ O4 <sup>i</sup>      | 0.84     | 1.81           | 2.5747(17)     | 150.3         |
| O3-H3A $\cdots$ O1W <sup>ii</sup>   | 0.84     | 1.66           | 2.494(2)       | 175.4         |
| O1W-H1WB $\cdots$ N1 <sup>iii</sup> | 0.79(3)  | 2.19(3)        | 2.972(2)       | 175(3)        |
| O1W-H1WB $\cdots$ O2 <sup>iii</sup> | 0.79(3)  | 2.53(3)        | 2.901(2)       | 111(3)        |
| O1W-H1WA $\cdots$ O1                | 1.01(4)  | 3.14(3)        | 3.828(2)       | 126(2)        |

Symmetry transformations used to generate equivalent atoms:

(i)  $x, y-1, z$  (ii)  $x, y+1, z$  (iii)  $-x-1, y-1/2, -z-1$

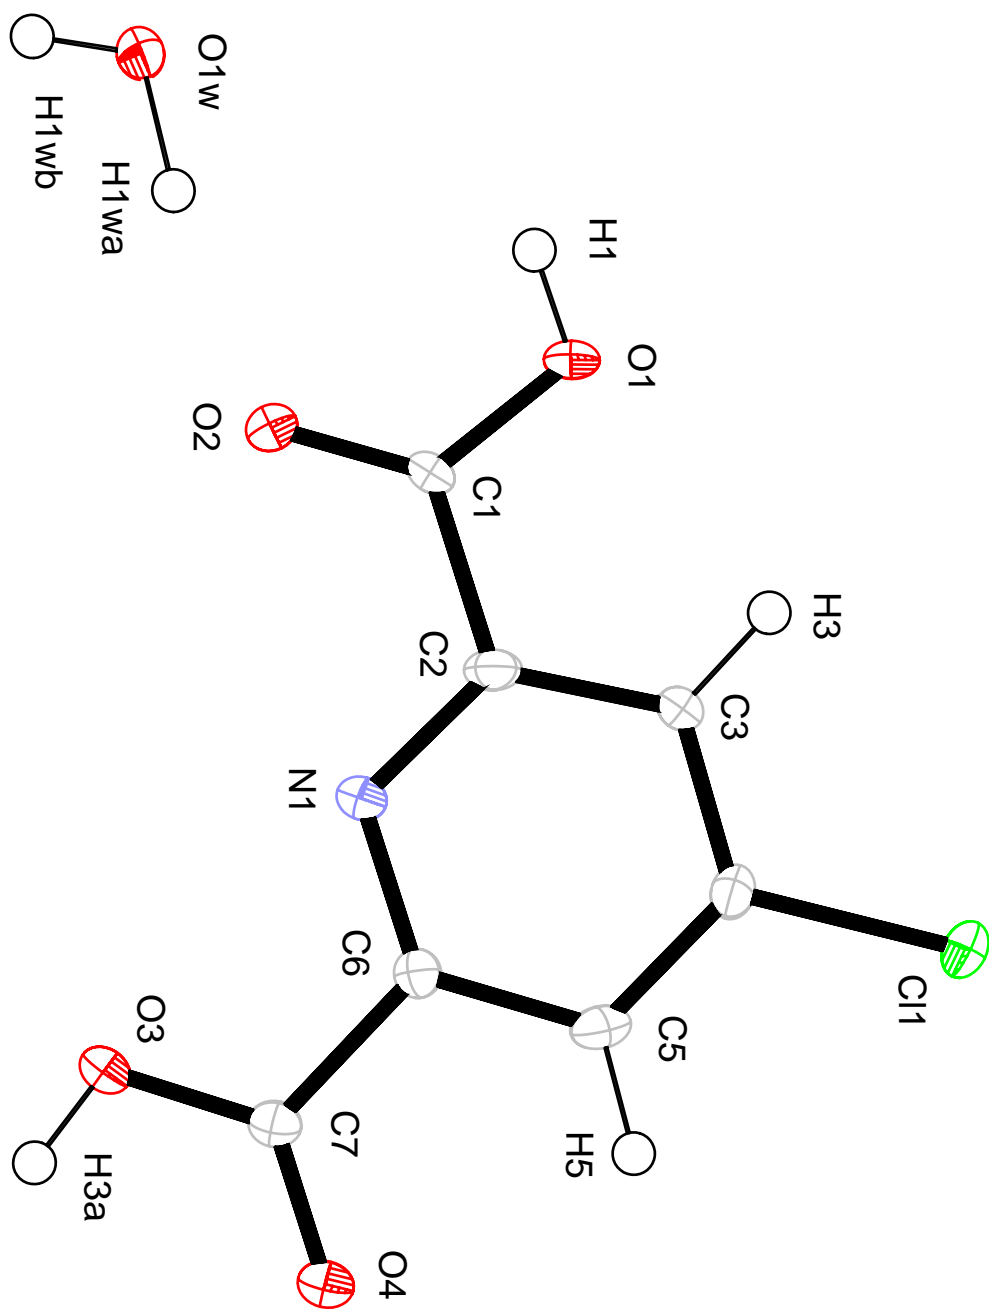

Supplementary Fig. 7 Ortep Plot (including numbering scheme) of 6:
